# Supplementary material for: Taxonomic and identification review of adventive Fiorinia Targioni Tozzetti (Hemiptera, Coccomorpha, Diaspididae) of the United States
Source: Zookeys. 2021 Oct 27;1065:141–203. doi: 10.3897/zookeys.1065.69171 (PMC9616077; doi:10.3897/zookeys.1065.69171)
Supplement: Supplementary material 2 — Table S1 [file zookeys-1065-141-s002.xlsx]

## Sheet: TableS1
Accession No.	Sample code	Gene regions in concatenated genese phylogenetic tree					Genus	Species	Note	Locality & Collection date	Host plant
		COI-5P: 1-645 (645 bp)	EF1a: 646-1353 (708 bp)	COII: 1354-1857 (504 bp)	COI-3P: 1858-2083 (226 bp)	28S: 2084-2508 (425 bp)
A. Sequences from this study
	4907.2	MW883930	MW893447	Missing Data	Missing Data	MW883866	Fiorinia	proboscidaria		USA: Florida, Hillsborough, Valrico, September 17, 2018	Citrus x paradisi
	4907.4	MW883931	MW893448	Missing Data	Missing Data	MW883867	Fiorinia	proboscidaria		USA: Florida, Hillsborough, Valrico, September 17, 2018	Citrus x paradisi
	4907.6	MW883932	MW893449	Missing Data	Missing Data	MW883868	Fiorinia	proboscidaria		USA: Florida, Hillsborough, Valrico, September 17, 2018	Citrus x paradisi
	5124.2	MW883933	MW893450	Missing Data	Missing Data	MW883869	Fiorinia	proboscidaria		USA: Florida, Pinellas, Palm Harbor, September 13, 2019	Citrus sp.
	5124.3	MW883934	Missing Data	Missing Data	Missing Data	MW883870	Fiorinia	proboscidaria		USA: Florida, Pinellas, Palm Harbor, September 13, 2019	Citrus sp.
	5124.4	MW883935	Missing Data	Missing Data	Missing Data	Missing Data	Fiorinia	proboscidaria	Not used in the tree	USA: Florida, Pinellas, Palm Harbor, September 13, 2019	Citrus sp.
	6549.2	MW883907	MW893442	Missing Data	Missing Data	MW883848	Fiorinia	externa	Import (North Carolina)	USA: Florida, Flagler, Palm Coast, 4 December 2019	Abies fraseri
	6549.5	MW883908	MW893443	Missing Data	Missing Data	MW883849	Fiorinia	externa	Import (North Carolina)	USA: Florida, Flagler, Palm Coast, 4 December 2019	Abies fraseri
	6550.2	MW883910	Missing Data	Missing Data	Missing Data	MW883850	Fiorinia	externa	Import (North Carolina)	USA: Florida, Flagler, Palm Coast, 4 December 2019	Abies fraseri
	6550.3	MW883911	Missing Data	Missing Data	Missing Data	MW883851	Fiorinia	externa	Import (North Carolina)	USA: Florida, Flagler, Palm Coast, 4 December 2019	Abies fraseri
	6550.4	MW883912	MW893444	Missing Data	Missing Data	MW883852	Fiorinia	externa	Import (North Carolina)	USA: Florida, Flagler, Palm Coast, 4 December 2019	Abies fraseri
	5998.2	MW883920	Missing Data	Missing Data	Missing Data	MW883860	Fiorinia	phantasma		USA: Florida, Palm Beach, Boynton Beach, 30 October 2019	Wodyetia bifurcate
	5998.4	MW883921	MW893446	Missing Data	Missing Data	MW883861	Fiorinia	phantasma		USA: Florida, Palm Beach, Boynton Beach, 30 October 2019	Wodyetia bifurcate
	5998.5	MW883922	Missing Data	Missing Data	Missing Data	MW883862	Fiorinia	phantasma		USA: Florida, Palm Beach, Boynton Beach, 30 October 2019	Wodyetia bifurcate
	5998.6	MW883923	Missing Data	Missing Data	Missing Data	MW883863	Fiorinia	phantasma		USA: Florida, Palm Beach, Boynton Beach, 30 October 2019	Wodyetia bifurcate
	287.2	MW883939	Missing Data	Missing Data	Missing Data	Missing Data	Fiorinia	theae	Not used in the tree	USA: Florida, Alachua, Gainesville, 24 January 2020	Ilex sp.
	287.3	MW883940	MW893454	Missing Data	Missing Data	MW883871	Fiorinia	theae		USA: Florida, Alachua, Gainesville, 24 January 2020	Ilex sp.
	287.4	MW883941	MW893455	Missing Data	Missing Data	MW883872	Fiorinia	theae		USA: Florida, Alachua, Gainesville, 24 January 2020	Ilex sp.
	D1184B	MW883924	Missing Data	Missing Data	Missing Data	Missing Data	Fiorinia	phantasma	Not used in the tree	Malaysia, February 3, 2009
	D1185B	MW883925	Missing Data	Missing Data	Missing Data	MW883864	Fiorinia	phantasma	Not used in the tree	Malaysia, February 3, 2009	Podocarpus sp.
	D4674F	MW883936	MW893451	Missing Data	Missing Data	MW883883	Fiorinia	sp.		Malaysia: Sarawak, Lambir Hills NP Canopy Walkway, 13 August 2013	NA
	D4682A	MW883937	MW893452	Missing Data	Missing Data	MW883884	Fiorinia	sp.		Malaysia: Sarawak, Lambir Hills NP Canopy Walkway, 13 August 2013	NA
	D4778A	MW883938	MW893453	Missing Data	Missing Data	MW883885	Fiorinia	sp.		Malaysia: Sarawak, Lambir Hills NP Canopy Walkway, 14 August 2013	NA
	4546.2	MW883913	Missing Data	Missing Data	Missing Data	MW883853	Fiorinia	fioriniae		USA: Florida,Marion, Ocala, 13 August 2019	Chamaerops humilis
	4546.3	MW883914	Missing Data	Missing Data	Missing Data	MW883854	Fiorinia	fioriniae		USA: Florida,Marion, Ocala, 13 August 2019	Chamaerops humilis
	4546.5	MW883915	Missing Data	Missing Data	Missing Data	MW883855	Fiorinia	fioriniae		USA: Florida,Marion, Ocala, 13 August 2019	Chamaerops humilis
	4546.6	MW883916	Missing Data	Missing Data	Missing Data	MW883856	Fiorinia	fioriniae		USA: Florida,Marion, Ocala, 13 August 2019	Chamaerops humilis
	4546.7	MW883917	Missing Data	Missing Data	Missing Data	MW883857	Fiorinia	fioriniae		USA: Florida,Marion, Ocala, 13 August 2019	Chamaerops humilis
	4546.1	MW883918	Missing Data	Missing Data	Missing Data	MW883858	Fiorinia	fioriniae		USA: Florida,Marion, Ocala, 13 August 2019	Chamaerops humilis
	4546.11	MW883919	Missing Data	Missing Data	Missing Data	MW883859	Fiorinia	fioriniae		USA: Florida,Marion, Ocala, 13 August 2019	Chamaerops humilis
	3174.5	MW883929	Missing Data	Missing Data	Missing Data	MW883876	Fiorinia	pinicola		USA: California, Los Angeles, 11 August 2020	Podocarpus macrophyllus
	3174.3	MW883928	Missing Data	Missing Data	Missing Data	MW883875	Fiorinia	pinicola		USA: California, Los Angeles, 11 August 2020	Podocarpus macrophyllus
	3174.2	MW883927	Missing Data	Missing Data	Missing Data	MW883874	Fiorinia	pinicola		USA: California, Los Angeles, 11 August 2020	Podocarpus macrophyllus
	S4-318	Missing Data	Missing Data	Missing Data	Missing Data	KX091288	Fiorinia	pinicola		China
	C2006230034	MW883926	MW893456	Missing Data	Missing Data	MW883865	Fiorinia	yongxingensis		China, Hainan, 2019	Palm
	D2464A	MW883942	Missing Data	Missing Data	Missing Data	Missing Data	Fiorinia	theae	Not used in the tree	Japan: Kyushu, Mt. Konosu, 31 March 2010	Eurya japonica
	D2464B	MW883943	Missing Data	Missing Data	Missing Data	Missing Data	Fiorinia	theae	Not used in the tree	Japan: Kyushu, Mt. Konosu, 31 March 2010	Eurya japonica
	D2464G	Missing Data	MW893445	Missing Data	Missing Data	MW883873	Fiorinia	hymenanthis		Japan: Kyushu, Mt. Konosu, 31 March 2010	Eurya japonica
	6549.6	MW883909	Missing Data	Missing Data	Missing Data	Missing Data	Fiorinia	externa	Not used in the tree	USA: Florida, Flagler, Palm Coast, 4 December 2019	Abies fraseri
B. Sequences from Genbank (Fiorinia species)
	D0299A	Missing Data	KY221297	Missing Data	Missing Data	KY219006	Fiorinia	externa		USA: Massachusetts, Amherst, 0.25 miles N. town Center, UMASS, 26 September 2002	Tsuga canadensis
	D3422A	Missing Data	Missing Data	Missing Data	Missing Data	KY219860	Fiorinia	fioriniae		South Africa: Western Cape, Stellenbosch: Jan Giliomee’s garden, 9 June 2011	NA
	D0387D	Missing Data	Missing Data	KY220719	KY220719	KY219064	Fiorinia	hymenanthis		Japan: Kyushu, Mt. Hiko, 20 April 2001	Rhododendron heptamerum
	D0387A	Missing Data	DQ145443	Missing Data	Missing Data	DQ145331	Fiorinia	hymenanthis		Japan: Kyushu, Mt. Hiko, 20 April 2001	Rhododendron heptamerum
	D0374A	Missing Data	KY221319	Missing Data	Missing Data	KY219046	Fiorinia	vacciniae		Japan: Izuhara Town, Tshushima Is., 27 April 2001	Eurya japonica
	D2494C	Missing Data	Missing Data	KY220980	KY220980	KY219634	Fiorinia	pinicola		Japan: Kyushu, HiraoSanso Park, 26 March 2010	Camellia sp.
	D0391A	Missing Data	KY221338	Missing Data	Missing Data	KY219074	Fiorinia	ficicola		Japan: Ryukyu Islands, Kunigashira Village, 4 September 2001	Ficus oxyphylla
	D0391D	Missing Data	KY221339	Missing Data	Missing Data	KY219076	Fiorinia	ficicola		Japan: Ryukyu Islands, Kunigashira Village, 4 September 2001	Ficus oxyphylla
	D0391B	Missing Data	Missing Data	Missing Data	Missing Data	KY219075	Fiorinia	ficicola		Japan: Ryukyu Islands, Kunigashira Village, 4 September 2001	Ficus oxyphylla
	D0250C	Missing Data	GQ403816	GQ424984	GQ424984	GQ325480	Fiorinia	theae		USA: Alabama, Auburn University , 19 March 2002	Camellia japonica
	D0250A	Missing Data	KY221274	Missing Data	Missing Data	KY218971	Fiorinia	theae		USA: Alabama, Auburn University , 19 March 2002	Camellia japonica
	D2857B	Missing Data	KY221628	KY221036	KY221036	KY219738	Fiorinia	theae		USA: Florida, 2792 CR 564, Bushnell_x000B_, 10 May 2010	Camellia sasanqua
	D1960C	Missing Data	Missing Data	KY220910	KY220910	KY219479	Fiorinia	theae		USA: Florida, Gainesville, San Felasco Nursery, 19 February 2010	Camellia sp.
	D4649M	Missing Data	Missing Data	Missing Data	Missing Data	MT677394	Fiorinia	macroprocta		Malaysia: Sarawak, Lambir Hills NP Canopy Crane, 11 August 2013	Dipterocarpus stellatus
	D4649L	Missing Data	Missing Data	Missing Data	Missing Data	MT677393	Fiorinia	macroprocta		Malaysia: Sarawak, Lambir Hills NP Canopy Crane, 11 August 2013	Dipterocarpus stellatus
	D4649K	Missing Data	Missing Data	Missing Data	Missing Data	MT677392	Fiorinia	macroprocta		Malaysia: Sarawak, Lambir Hills NP Canopy Crane, 11 August 2013	Dipterocarpus stellatus
	D4649C	Missing Data	Missing Data	Missing Data	Missing Data	MT677390	Fiorinia	macroprocta		Malaysia: Sarawak, Lambir Hills NP Canopy Crane, 11 August 2013	Dipterocarpus stellatus
	D5254J	Missing Data	Missing Data	Missing Data	Missing Data	MW883882	Fiorinia	proboscidaria		USA: Florida, Tampa: 6712 Bejamin (sic) Rd., 30 October 2014	Citrus sinensis
	D5254I	Missing Data	Missing Data	Missing Data	Missing Data	MW883881	Fiorinia	proboscidaria		USA: Florida, Tampa: 6712 Bejamin (sic) Rd., 30 October 2014	Citrus sinensis
	D5254H	Missing Data	Missing Data	Missing Data	Missing Data	MW883880	Fiorinia	proboscidaria		USA: Florida, Tampa: 6712 Bejamin (sic) Rd., 30 October 2014	Citrus sinensis
	D5254G	Missing Data	Missing Data	Missing Data	Missing Data	MW883879	Fiorinia	proboscidaria		USA: Florida, Tampa: 6712 Bejamin (sic) Rd., 30 October 2014	Citrus sinensis
	D5254F	Missing Data	Missing Data	Missing Data	Missing Data	MW883878	Fiorinia	proboscidaria		USA: Florida, Tampa: 6712 Bejamin (sic) Rd., 30 October 2014	Citrus sinensis
	D5254A	Missing Data	Missing Data	Missing Data	Missing Data	MW883877	Fiorinia	proboscidaria		USA: Florida, Tampa: 6712 Bejamin (sic) Rd., 30 October 2014	Citrus sinensis
	D4997A	Missing Data	Missing Data	Missing Data	Missing Data	MT677464	Fiorinia	sp.		Malaysia: Sarawak, Lambir Hills NP Canopy Crane, 21 August 2013	Santiria laevigata
	D4611L	Missing Data	Missing Data	Missing Data	Missing Data	MT677376	Fiorinia	sp.		Malaysia: Sarawak, Lambir Hills NP Canopy Crane, 10 August 2013	Gironniera hirta
	D4611H	Missing Data	Missing Data	Missing Data	Missing Data	MT677375	Fiorinia	sp.		Malaysia: Sarawak, Lambir Hills NP Canopy Crane, 10 August 2013	Gironniera hirta
	D4611F	Missing Data	Missing Data	Missing Data	Missing Data	MT677374	Fiorinia	sp.		Malaysia: Sarawak, Lambir Hills NP Canopy Crane, 10 August 2013	Gironniera hirta
	D4611E	Missing Data	Missing Data	Missing Data	Missing Data	MT677373	Fiorinia	sp.		Malaysia: Sarawak, Lambir Hills NP Canopy Crane, 10 August 2013	Gironniera hirta
	D4611D	Missing Data	Missing Data	Missing Data	Missing Data	MT677372	Fiorinia	sp.		Malaysia: Sarawak, Lambir Hills NP Canopy Crane, 10 August 2013	Gironniera hirta
	D4611C	Missing Data	Missing Data	Missing Data	Missing Data	MT677371	Fiorinia	sp.		Malaysia: Sarawak, Lambir Hills NP Canopy Crane, 10 August 2013	Gironniera hirta
	D4611B	Missing Data	Missing Data	Missing Data	Missing Data	MT677370	Fiorinia	sp.		Malaysia: Sarawak, Lambir Hills NP Canopy Crane, 10 August 2013	Gironniera hirta
	D4590D	Missing Data	KY221798	KY221186	KY221186	KY220004	Fiorinia	sp.		Malaysia: Sarawak, Lambir Hills NP Canopy Crane, 10 August 2013	Gironniera hirta
	D4815C	Missing Data	Missing Data	Missing Data	Missing Data	MW883886	Fiorinia	sp.		Malaysia: Sarawak, Lambir Hills NP Canopy Crane, 21 August 2013	Swintonia foxworthyi
	D4815B	Missing Data	Missing Data	Missing Data	Missing Data	MT677420	Fiorinia	sp.		Malaysia: Sarawak, Lambir Hills NP Canopy Crane, 21 August 2013	Swintonia foxworthyi
C. Sequences from Genbank (Non Fiorinia species)
	D2666A	Missing Data	KY221603	KY221013	KY221013	KY219678	Unaspis	yanonensis
	D0929A	Missing Data	KY221435	KY220793	KY220793	KY219275	Pellucidaspis	epiphytidis
	D3642A	Missing Data	KY221716	KY221101	KY221101	KY219876	Pseudaulacaspis	miyakoensis
	D2491D	Missing Data	Missing Data	KY220977	KY220977	KY219631	Pseudaulacaspis	celtis
	D2531A	Missing Data	KY221586	KY220989	KY220989	KY219650	Rutherfordia	major
	D0379C	Missing Data	KY221325	Missing Data	Missing Data	KY219053	Unachionaspis	signata
	D0852D	Missing Data	KY221425	KY220783	KY220783	KY219248	Unachionaspis	tenuis
	D2768A	Missing Data	Missing Data	KY221031	KY221031	KY219727	Odonaspis	minima
	D0642A	Missing Data	GQ403840	GQ425045	GQ425045	GQ325514	Nikkoaspis	shiranensi
	D4840A	Missing Data	KY221802	KY221191	KY221191	KY220011	Kuwanaspis	sp.
	D4838J	Missing Data	KY221801	KY221190	KY221190	KY220010	Kuwanaspis	howardi
	D4838A	Missing Data	Missing Data	KY221188	KY221188	KY220008	Kuwanaspis	vermiformis
	D0398B	Missing Data	Missing Data	KY220727	KY220727	KY219084	Kuwanaspis	takahashii
	D2670A	Missing Data	Missing Data	KY221017	KY221017	KY219682	Kuwanaspis	pseudoleucaspis
	D1901A	Missing Data	Missing Data	KY220883	KY220883	KY219448	Kuwanaspis	hikosani
	D3653A	Missing Data	KY221717	Missing Data	Missing Data	KY219877	Rolaspis	compositae
	D3558A	Missing Data	KY221713	KY221098	KY221098	KY219872	Rolaspis	incisa
	D4385A	Missing Data	KY221784	Missing Data	Missing Data	KY219977	Rolaspis	whitehilli
	D3554B	Missing Data	KY221711	KY221096	KY221096	KY219870	Rolaspis	lounsburyi
	D2020B	Missing Data	GQ403896	Missing Data	Missing Data	GQ325575	NA	NA	Diaspididae
	D2035B	Missing Data	GQ403904	Missing Data	Missing Data	GQ325535	Poliaspis	exocarpi
	D2021A	Missing Data	GQ403897	GQ425085	GQ425085	GQ325533	Poliaspis	sp.
	D0752A	Missing Data	GQ403856	GQ425057	GQ425057	GQ325564	Poliaspis	callitris
	D2065A	Missing Data	GQ403918	GQ425093	GQ425093	GQ325536	Poliaspis	sp.
	D2099A	Missing Data	GQ403930	KY220939	KY220939	GQ325538	Poliaspis	syringae
	D0661B	Missing Data	KY221397	KY220755	KY220755	KY219173	Poliaspis	floccosa
	D0649C	Missing Data	KY221396	KY220753	KY220753	KY219170	Poliaspis	media
	D0041A	Missing Data	GQ403810	Missing Data	Missing Data	GQ325550	Pseudaulacaspis	sp.
	D2105A	Missing Data	GQ403933	Missing Data	Missing Data	GQ325558	Pseudaulacaspis	sp.
	D2043A	Missing Data	GQ403909	GQ425087	GQ425087	GQ325546	Pseudaulacaspis	difissata
	D0744B	Missing Data	KY221408	KY220763	KY220763	KY219200	Pseudaulacaspis	eugeniae
	D2116A	Missing Data	Missing Data	Missing Data	Missing Data	KY219543	Anzaspis	sp.
	D2114A	Missing Data	KY221547	KY220944	KY220944	KY219541	Pseudaulacaspis	sp.
	D2050A	Missing Data	GQ403912	Missing Data	Missing Data	GQ325555	Pseudaulacaspis	sp.
	D0874B	Missing Data	KY221428	KY220786	KY220786	KY219254	Anzaspis	cordylinidis
	D2122A	Missing Data	GQ403938	GQ425103	GQ425103	GQ325582	Pseudaulacaspis	grandilobis
	D2115A	Missing Data	GQ403935	GQ425101	GQ425101	GQ325556	Pseudaulacaspis	brimblecombei
	D3717B	Missing Data	KY221724	KY221108	KY221108	KY219885	Pseudaulacaspis	simplex
	D2199A	Missing Data	KY221563	KY220958	KY220958	KY219590	Lineaspis	striata
	D0593C	Missing Data	GQ403830	GQ425034	GQ425034	GQ325509	Lineaspis	striata
	D1832D	Missing Data	Missing Data	KY220848	KY220848	KY219406	Pseudaulacaspis	momi
	D3716A	Missing Data	KY221723	KY221107	KY221107	KY219884	Pseudaulacaspis	biformis
	D0377A	Missing Data	KY221322	GQ425016	GQ425016	KY219049	Pseudaulacaspis	prunicola
	D3762A	Missing Data	KY221733	KY221115	KY221115	KY219898	Pseudaulacaspis	pentagona
	D0400D	Missing Data	KY221346	KY220728	KY220728	KY219087	Pseudaulacaspis	cockerelli
